# Supplementary material for: The Effects of Minimal Group Membership on Young Preschoolers’ Social Preferences, Estimates of Similarity, and Behavioral Attribution
Source: Oxford University Press journal article supplement (doi:10.1525/collabra.44), 2016-01-01
Supplement: collabra-44-s3_dataset.xlsx [file collabra-44-s3_dataset.xlsx]

## Sheet: data
subject	AGE	GENDER	GROUP	CHECK	expatt	A	N	attrib	pref
101	4.1	M	O	1	0.6	0.6	0.2	0.4	0.6
102	4.3	F	O	1	1	0.6	0.6	0.6	0.4
103	3.9	M	G	1	1	0.6	0.6	0.6	0.8
104	3.8	F	O	1	0.4	0.4	0.4	0.4	0.6
105	3.9	M	G	1	0.6	NA	NA	NA	0.2
106	4.2	M	O	1	0.4	0.4	0.6	0.5	0.4
107	4.1	M	G	1	0.8	0.4	0.6	0.5	0.6
108	3.9	M	G	1	0	0.4	0	0.2	0.2
109	3.5	F	O	1	0.4	0.4	1	0.7	0.8
110	3.9	F	O	1	0.8	0.2	0	0.1	0.8
111	3.9	M	G	1	0	0.6	0.6	0.6	0.6
112	3.8	F	G	1	1	0.8	1	0.9	1
113	4.3	M	O	1	0.4	0.6	0.4	0.5	0.4
114	3.3	F	O	1	0.4	0.2	0.4	0.3	0.4
115	4.8	M	O	1	1	0.4	0.4	0.4	0.4
116	4.8	M	O	1	0.8	0.6	0.4	0.5	0.6
117	4.4	F	G	1	1	0	0.6	0.3	0.2
118	3.9	F	G	1	0.6	0.4	0.4	0.4	0.6
119	3.8	F	G	1	0.2	0.6	0.8	0.7	0.6
120	3.8	M	O	1	1	0.6	0.6	0.6	0.2
121	3.6	M	G	1	0.6	0.6	0.8	0.7	0.4
122	4	F	O	1	1	1	1	1	0.8
123	3.2	F	O	1	0.6	0.8	0.6	0.7	0.2
124	3.4	F	O	1	0.8	0.6	0.6	0.6	0.6
125	3.5	F	G	1	0.8	0.4	1	0.7	0.8
126	3.3	M	O	1	0.8	1	0.2	0.6	0.8
127	3.1	F	G	1	0.8	0.6	0.6	0.6	0.8
128	3.3	F	O	1	0.8	0.6	0.2	0.4	0.4
129	3.3	M	G	1	0.4	0.4	0.4	0.4	0.6
130	3.6	F	O	1	0.6	0.6	0.6	0.6	0.8
131	3.8	M	O	1	0.8	0.4	0.6	0.5	0.6
132	3.7	M	O	1	0.2	0.8	0.8	0.8	0.8
133	3.7	M	O	1	0.6	0.6	1	0.8	0.4
134	3.8	M	G	1	0.8	0.2	0.4	0.3	0.6
135	3.9	M	G	1	0	0.6	0.8	0.7	0.8
136	3.8	M	G	0	0.6	0.4	1	0.7	0.4
137	3.6	M	G	0	0.6	0.2	0	0.1	0.6
138	3.9	M	O	1	0.4	0.6	0.6	0.6	0.6
139	3.3	M	O	0	0.6	0.6	0.4	0.5	0.2
140	3.1	M	G	1	1	1	0.8	0.9	1
141	3.9	M	O	1	0.4	0.4	0.4	0.4	0.2
142	3.8	F	O	0	0.4	0.6	0.6	0.6	0.8
143	3.1	M	O	0	0.4	0.4	0.8	0.6	0.4
144	3.3	F	G	1	0.8	0.6	0.4	0.5	0.8
145	3.2	M	O	0	0.2	0.6	0.4	0.5	1
146	3.6	F	G	1	0.8	0.4	0.4	0.4	0.6
147	3.5	F	G	1	0.4	0.6	0.2	0.4	0.6
148	3.9	M	O	1	1	0.4	0.8	0.6	1
149	3.6	F	G	0	1	0.4	0.6	0.5	0.6
150	3.8	F	G	1	0.4	0.6	0.6	0.6	0.8
151	3.8	M	G	0	0	0.2	0.4	0.3	0.8
152	2.9	F	G	NA	1	NA	NA	NA	1
153	3.8	F	G	1	0.4	0.4	0.4	0.4	0.6
154	3.7	F	G	0	0.8	0.8	0.4	0.6	0.6
155	3.8	M	O	1	0.8	0.4	0.6	0.5	0.6
156	3.3	M	G	1	0.4	0	0.4	0.2	0.8
157	3.7	M	O	1	1	0.2	0.6	0.4	0.6
158	3.8	M	O	0	0.2	0.8	0.6	0.7	0.6
159	3.3	F	O	1	NA	0.4	0.8	0.6	0.6
